# Supplementary material for: Mutation of epigenetic regulators TET2 and MLL3 in patients with HTLV-I-induced acute adult T-cell leukemia
Source: PubMed Central journal article supplement (PMC4754821; doi:10.1186/s12943-016-0500-z), 2016-02-16
Supplement: 12943_2016_500_MOESM2_ESM.pdf [file 12943_2016_500_MOESM2_ESM.pdf]

# Table 2

**MLL3**  
Chr21 GCCAGGTCTCTTAATACTTATCTAAAGAAGTGTGTTGTGTAACATTTAATAAAATGTTTTA  
Chr1-1 GCCAGGTCTCTTAATACTTATCTAAAGAAGTGTGTTGTATAACATTTAATAAAATGTTTTA  
Chr1-2 GCCAGGTCTCTTAATACTTATCTAAAGAAGTGTGTTGTATAACATTTAATAAAATGTTTTA  
Chr1-3 GCCAGGTCTCTTAATACTTATCTAAAGAAGTGTGTTGTATAACATTTAATAAAATGTTTTA  
Chr2-1 GCCAGGTCTCTTAATACTTATCTAAAGAAGTGTGTTGTATAACATTTAATAAAATGTTTTA  
Chr2-2 -CCAGGTTTCTTAATACTTATCTAAAGAAGTGTGTTGTATAACATTTAATAAAATGTTTTA  
Chr13 GCCAGGTCTCTTAATACTTATCTAAAGAAGTGTGTTGTATAACATTTAATAAAATGTTTTA  
\*\*\*\*\* \* \*\*\*\*\*

**MLL3**  
Chr21 TCTCAGTGGCATTGGATTAAAAATTATTTTGGGCTGTACAGAATGTTGACTTTTC**CC**  
Chr1-1 TCTCAGTGGCATTGGATTAAAAATTATTTTGGGCTGTACAGAATGTTGACTTTTCCT  
Chr1-2 TCTCAGTGGCATTGGATTAAAAATTATTTTGGGCTGTACAGAATGTTGACTTTTCCT  
Chr1-3 TCTCAGTGGCATTGGATTAAAAATTATTTTGGGCTGTACAGAATGTTGACTTTTCCT  
Chr2-1 TCTCAGTGGCATTGGATTAAAAATTATTTTGGGCTGTACAGAATGTTGACTTTTCCT  
Chr2-2 TCTCAGTGGCATTGGATTAAAAATTATTTTGGGCTGTACAGAATGTTGACTTTTCCT  
Chr13 TCTCAGTGGCATTGGATTAAAAATTATTTTGGGCTGTACAGAATGTTGACTTTTCCT  
\*\*\*\*\*

**MLL3**  
Chr21 AATCTGTTACATAGGGCCGTGGGTCTGGATTCCAGGAAAGCGGAGACCTCGAGGTGCAG  
Chr1-1 AATCTGTTACATAGGGCCATGGGTCTGGATTCCAGGAAAGCGGAGACCTCGAGGTGCAG  
Chr1-2 AATCTGTTACATAGGGCCATGGGTCTGGATTCCAGGAAAGCGGAGACCTCGAGGTGCAG  
Chr1-3 AATCTGTTACATAGGGCCATGGGTCTGGATTCCAGGAAAGCGGAGACCTCGAGGTGCAG  
Chr2-1 AATCTGTTACATAGGGCCATGGGTCTGGATTCCAGGAAAGCGGAGACCTCGAGGTGCAG  
Chr2-2 AATCTGTTACATAGGGCCATGGGTCTGGATTCCAGGAAAGCGGAGACCTCGAGGTGCAG  
Chr13 AATCTGTTACATAGGGCTGTGGGTCTGGATTCCAGGAAAGCGGAGACCTCGAGGTGCAG  
\*\*\*\*\*

**MLL3**  
Chr21 GACTGTCGGGGCGAAGGTGGCCGAGGCAGGTCAAAGCTGAAAAGTGAATCGGAGCTGTTG  
Chr1-1 GACTGTCGGGGCGAGGTGGCCGAGGCAGGTCAAAGCTGAAAAGTGAATCGGAGCTGTTG  
Chr1-2 GACTGTCGGGGCGAGGTGGCCGAGGCAGGTCAAAGCTGAAAAGTGAATCGGAGCTGTTG  
Chr1-3 GACTGTCGGGGCGAGGTGGCCGAGGCAGGTCAAAGCTGAAAAGTGAATCGGAGCTGTTG  
Chr2-1 GACTGTCGGGGCGAGGTGGCCGAGGCAGGTCAAAGCTGAAAAGTGAATCGGAGCTGTTG  
Chr2-2 GACTGTCGGGGCGAGGTGGCCGAGGCAGGTCAAAGCTGAAAAGTGAATCGGAGCTGTTG  
Chr13 GACTGTCGGGGCTGAAGGTGGCCGAGGCAGGTCAAAGCTGAAAAGTGAATCGGAGCTGTTG  
\*\*\*\*\*

**MLL3**  
Chr21 TATTACCTGGGGTGAGGCTTCTTTCATGTATATTTTCTCTAATCTAAATGTCAGTTAATG  
Chr1-1 TATTGCCTGGGGTGAGGCTTGCTTCATGTATATTTTCTCTAATCTAAATGTCAGTTAATG  
Chr1-2 TATTGCCTGGGGTGAGGCTTGCTTCATGTATATTTTCTCTAATCTAAATGTCAGTTAATG  
Chr1-3 TATTGCCTGGGGTGAGGCTTGCTTCATGTATATTTTCTCTAATCTAAATGTCAGTTAATG  
Chr2-1 TATTGCCTGGGGTGAGGCTTGCTTCATGTATATTTTCTCTAATCTAAATGTCAGTTAATG  
Chr2-2 TATTGCCTGGGGTGAGGCTTGCTTCATGTATATTTTCTCTAATCTAAATGTCAGTTAATG  
Chr13 TATTGCCTGGGGTGAGGCTTCTTCATGTATATTTTCTCTAATCTAAATGTCAGTTAATG  
\*\*\*\* \*\*\*\*\*

**MLL3**  
Chr21 ATGAAAACTCATAGCAAGTTATTTTGATCTTAAGAGTCAATATAAATAGGTCAAAATGTT  
Chr1-1 ATGAAAACTCATAGCAAGTTATTTTGATCTTAAGAGTCAATATAAATAGGTCAAAATGTT  
Chr1-2 ATGAAAACTCATAGCAAGTTATTTTGAACTTAAAAATCATATAAATAGGTCAAAATGTT  
Chr1-3 ATGAAAACTCATAGCAAGTTATTTTGAACTTAAAAATCATATAAATAGGTCAAAATGTT  
Chr2-1 ATGAAAACTCATAGCAAGTTATTTTGAACTTAAAAATCATATAAATAGGTCAAAATGTT  
Chr2-2 ATGAAAACTCATAGCAAGTTATTTTGAACTTAAAAATCATATAAATAGGTCAAAATGTT  
Chr13 ATGACAACTCATAGCAAGTTATTTTGAACTTAAAGAGTTATATAAATAGGTCAAAATGTT  
\*\*\*\* \*\*\*\*\*

**MLL3**  
Chr21 TATTTTACTGTCCTACTTTT-----TTTTT-----GAGCCTCTGGTTACGTTTTC  
Chr1-1 TATTTTACTGTCCTACTTTGCTTTTTTTTTTTTTTTT---GAGCCTCTGGTTACGTTTTC  
Chr1-2 TATTTTACTGTCCTACTTTGCTTTTTTTTTTTTTTTT---GAGCCTCTGGTTACGTTTTC  
Chr1-3 TATTTTACTGTCCTACTTTGCTTTTTTTTTTTTTTTT--TGAGCCTCTGGTTACGTTTTC  
Chr2-1 TATTTTACTGTCCTACTTTGCTTTTTTTTTTTTTTTTTTTGAGCCTCTGGTTACGTTTTC  
Chr2-2 TATTTTACTGTCCTACTTTGCTTTTTTTTTTTTTTTT---TGAGCCTCTGGTTACGTTTTC  
Chr13 TATTTTACTGTTCTACTTTGCTTTTTTTTTT-----GAGCCTCTGGTTACGTTTTC  
\*\*\*\*\* \*\*\*\*\*
