# Supplementary material for: Mutation of epigenetic regulators TET2 and MLL3 in patients with HTLV-I-induced acute adult T-cell leukemia
Source: Mol Cancer. 2016 Feb 16;15:15. doi: 10.1186/s12943-016-0500-z (PMC4754821; doi:10.1186/s12943-016-0500-z)
Supplement: Additional file 1: Table S1. — Novel mutations identified in epigenetic regulators EZH1, EZH2, EED, SUZ12, DNMT1, DNMT3A, DNMT3B, TET1, TET2, TET3, IDH1/2, MLL, MLL2, MLL3, MLL4 and ASXL1 in ATL patients. The mutations previously reported as SNPs are not included. Novel mutations are labeled in blue (missense) or in red (nonsense). Samples 1–7, 10 and 11 were isolated from patients diagnosed with acute ATL. Samples 8, 9, 12 and 13 were isolated from high proviral load tissues (Fig. 1) from patients diagnosed with lymphoma ATL. (PDF 231 kb) [file 12943_2016_500_MOESM1_ESM.pdf]

Table 1

|                 | ATL 1  | ATL 2  | ATL 3  | ATL 4           | ATL 5                            | ATL 6               | ATL 7  | ATL 8            | ATL 9               | ATL10  | ATL11  | ATL12  | ATL13  |
|-----------------|--------|--------|--------|-----------------|----------------------------------|---------------------|--------|------------------|---------------------|--------|--------|--------|--------|
| EZH1/2          | wt     | wt     | wt     | wt              | wt                               | wt                  | wt     | wt               | wt                  | wt     | wt     | wt     | wt     |
| EED             | wt     | wt     | wt     | wt              | wt                               | wt                  | wt     | wt               | wt                  | wt     | wt     | wt     | wt     |
| SUZ12           | wt     | wt     | wt     | wt              | V68A<br>P74S                     | wt                  | wt     | wt               | wt                  | wt     | wt     | wt     | wt     |
| DNMT1<br>Iso-a  | wt     | wt     | wt     | wt              | T161A<br>P153S<br>R151S<br>M122K | wt                  | wt     | wt               | wt                  | wt     | wt     | wt     | wt     |
| DNMT3A<br>iso-b | wt     | wt     | wt     | wt              | wt                               | I103S<br>V107G      | wt     | wt               | wt                  | wt     | wt     | wt     | wt     |
| DNMT3B<br>Iso-1 | wt     | wt     | N442K  | wt              | wt                               | wt                  | wt     | wt               | wt                  | wt     | wt     | wt     | N442K  |
| TET1            | I1123M | I1123M | I1123M | I1123M<br>K931R | I1123M                           | I1123M              | I1123M | I1123M<br>I1229T | I1123M              | I1123M | I1123M | I1123M | I1123M |
| TET2            | wt     | wt     | wt     | wt              | wt                               | del R1543<br>P1544S | wt     | K1924E           | del R1543<br>P1575L | wt     | Q876*  | Q414*  | wt     |
| TET3            | wt     | wt     | wt     | wt              | wt                               | wt                  | wt     | wt               | wt                  | wt     | wt     | wt     | wt     |
| IDH1/2          | wt     | wt     | wt     | wt              | wt                               | wt                  | wt     | wt               | wt                  | wt     | wt     | wt     | wt     |
| MLL             | wt     | wt     | wt     | wt              | wt                               | S2511F              |        | wt               | wt                  | wt     | wt     |        | wt     |
| MLL2            | wt     | wt     | wt     | wt              | wt                               | T698I               | wt     | wt               | wt                  | wt     | wt     | wt     | wt     |
| MLL3            | wt     | wt     | R284Q  | wt              | R904*                            | I3590L              | wt     | V1089L           | K433T               | wt     | wt     | wt     | wt     |
| MLL4            | wt     | wt     | wt     | wt              | P635R                            | G378E<br>E382K      | wt     | wt               | G491S<br>P635R      | wt     | wt     | wt     | wt     |
| ASXL1           | wt     | wt     | wt     | V1092M          | S1166R                           | wt                  | wt     | wt               | wt                  | wt     | wt     | wt     | wt     |
